# Supplementary material for: Novel metabolomic profile of subjects with non-classic apparent mineralocorticoid excess
Source: PubMed Central journal article supplement (PMC8387493; doi:10.1038/s41598-021-96628-6), 2021-08-25
Supplement: 41598_2021_96628_MOESM1_ESM.pdf [file 41598_2021_96628_MOESM1_ESM.pdf]

# NOVEL METABOLOMIC PROFILE OF SUBJECTS WITH NON-CLASSIC APPARENT MINERALOCORTICOID EXCESS

## *Supplementary Material*

Alejandra Tapia-Castillo<sup>\*a,b,c</sup>, Cristian A. Carvajal<sup>\*a,b,c</sup>, Xaviera López-Cortés<sup>d</sup>,  
Andrea Vecchiola<sup>a,b,c</sup>, \*Carlos E. Fardella<sup>a,b,c</sup>

<sup>a</sup>Department of Endocrinology, School of Medicine, Pontificia Universidad Católica de Chile, Santiago, Chile. <sup>b</sup>Millennium Institute on Immunology and Immunotherapy (IMII-ICM), Santiago, Chile. <sup>c</sup>Centro Traslacional de Endocrinología UC (CETREN-UC). <sup>d</sup>Department of Computer Science and Industries, Faculty of Engineering Science, Universidad Católica del Maule, Talca, Chile.

\*contributed equally to this work

**Running head:** Metabolomic profile of NC-AME subjects

**Keywords:** metabolomics, nonclassic AME, mineralocorticoid receptor, hypertension

**\*Correspondence and reprint requests:**

Carlos E. Fardella, MD

Departamento de Endocrinología, Escuela de Medicina

Pontificia Universidad Católica de Chile

Diagonal Paraguay 362, piso 4

Santiago 8330077, CHILE

Ph: (56-2) 2354-3634

[cfardella@med.puc.cl](mailto:cfardella@med.puc.cl)

**Supplementary Table 1: Model quality and description**

| Parameter                                                                                                                                                                                                                                                           | Model | Type    | A     | N  | R2X(cum) | R2Y(cum) | Q2(cum) |
|---------------------------------------------------------------------------------------------------------------------------------------------------------------------------------------------------------------------------------------------------------------------|-------|---------|-------|----|----------|----------|---------|
| <b>Negative</b>                                                                                                                                                                                                                                                     | M1    | PCA-X   | 6     | 55 | 0.334    | /        | 0.0835  |
|                                                                                                                                                                                                                                                                     | M2    | PLS-DA  | 4     | 55 | 0.232    | 0.991    | 0.815   |
|                                                                                                                                                                                                                                                                     | M3    | OPLS-DA | 1+3+0 | 55 | 0.232    | 0.991    | 0.499   |
| <b>Positive</b>                                                                                                                                                                                                                                                     | M1    | PCA-X   | 10    | 55 | 0.482    | /        | 0.0847  |
|                                                                                                                                                                                                                                                                     | M2    | PLS-DA  | 2     | 55 | 0.148    | 0.901    | 0.74    |
|                                                                                                                                                                                                                                                                     | M3    | OPLS-DA | 1+3+0 | 55 | 0.233    | 0.986    | 0.742   |
| <p><b>Note:</b> In PCA analysis, R2X &gt; 0.4 is better; In PLS-DA and OPLS-DA analysis, the R2X parameter is not important, mainly R2Y and Q2. The two values &gt; 0.5 are better, the closer to 1, the better. Cum means cumulative. A: The component number.</p> |       |         |       |    |          |          |         |

A)

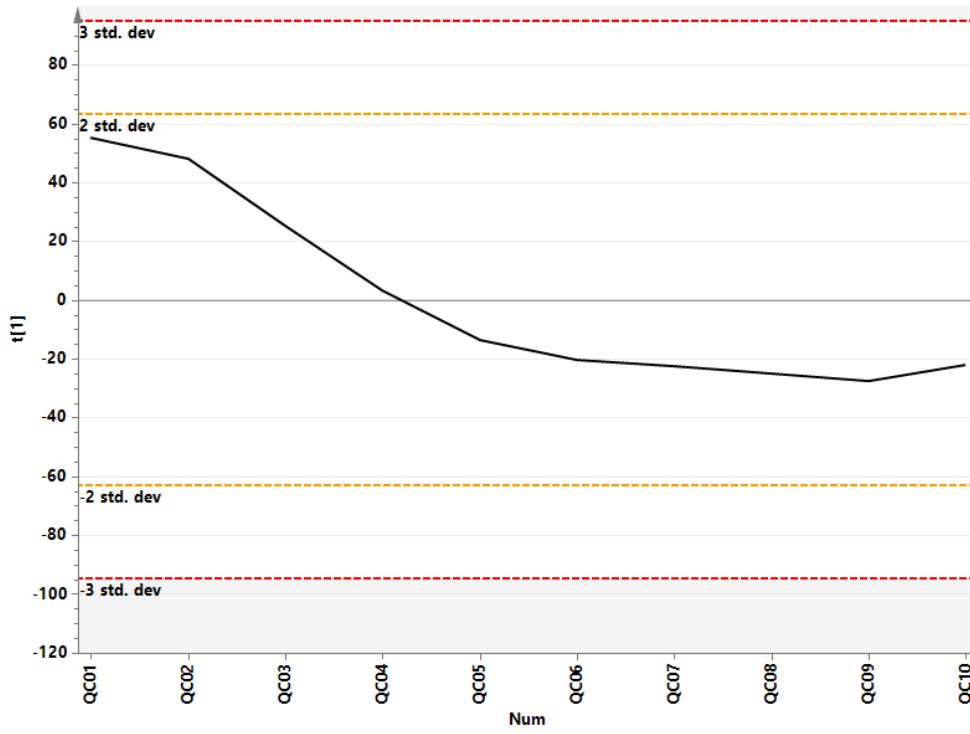

B)

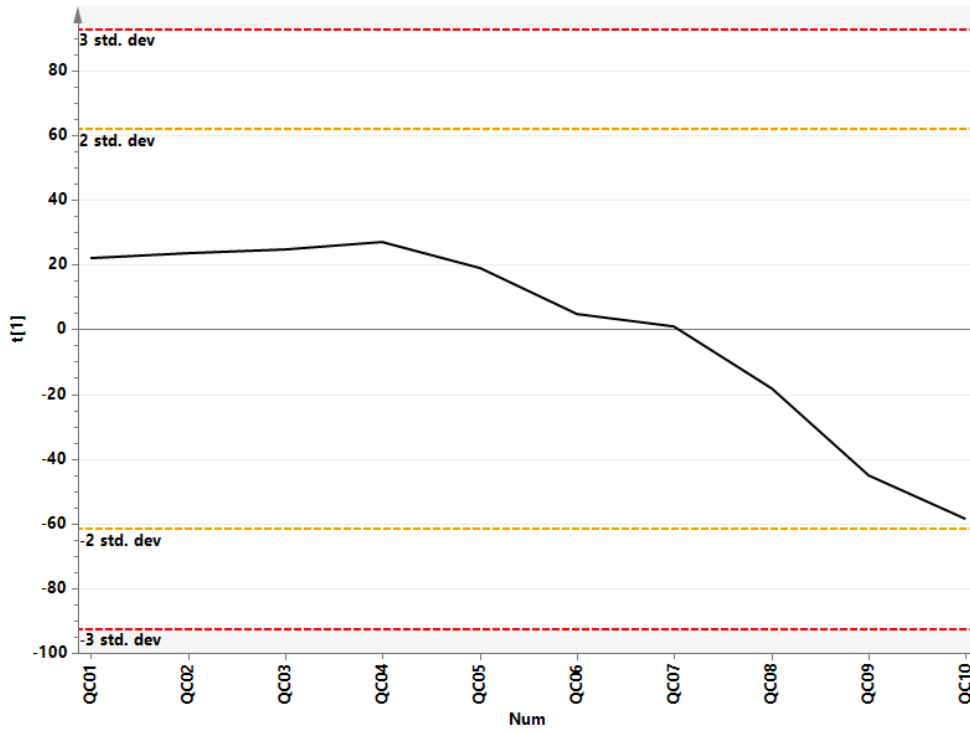

C)

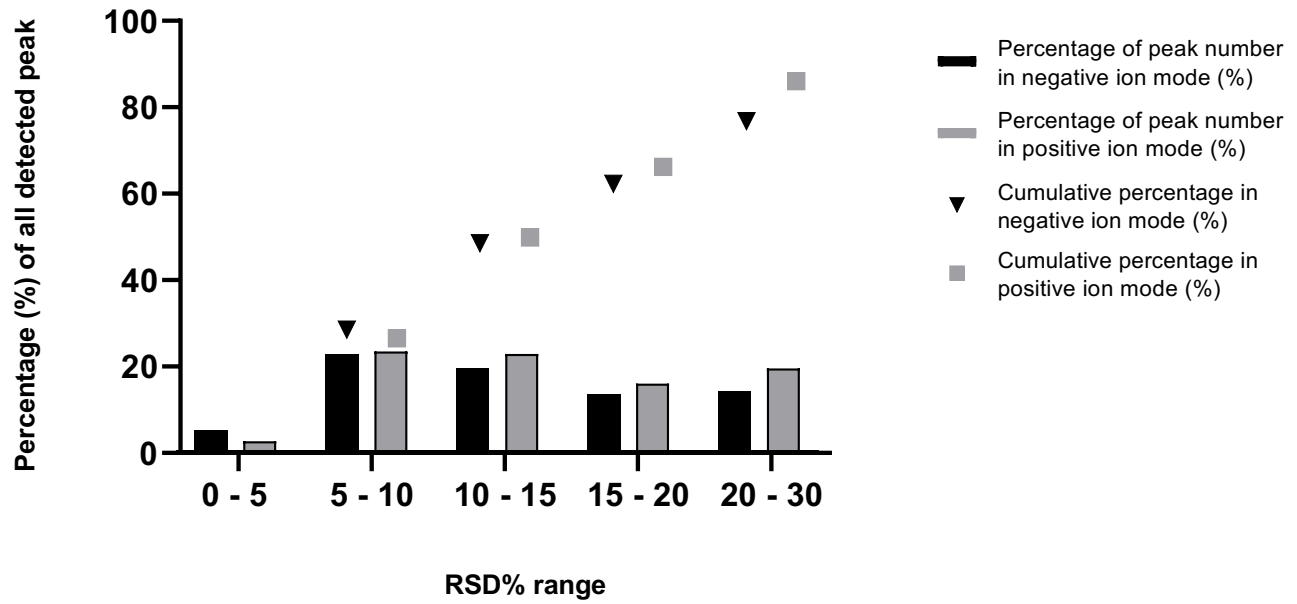

**Supplementary Figure 1.** The PCA score plot of the QC samples, the X axis indicates the number of QC samples, the Y axis indicates the range of RSD. A) negative mode; B) positive mode. C) Relative standard deviation (RSD%) distribution of all metabolites in the pooled quality control (QC) samples.

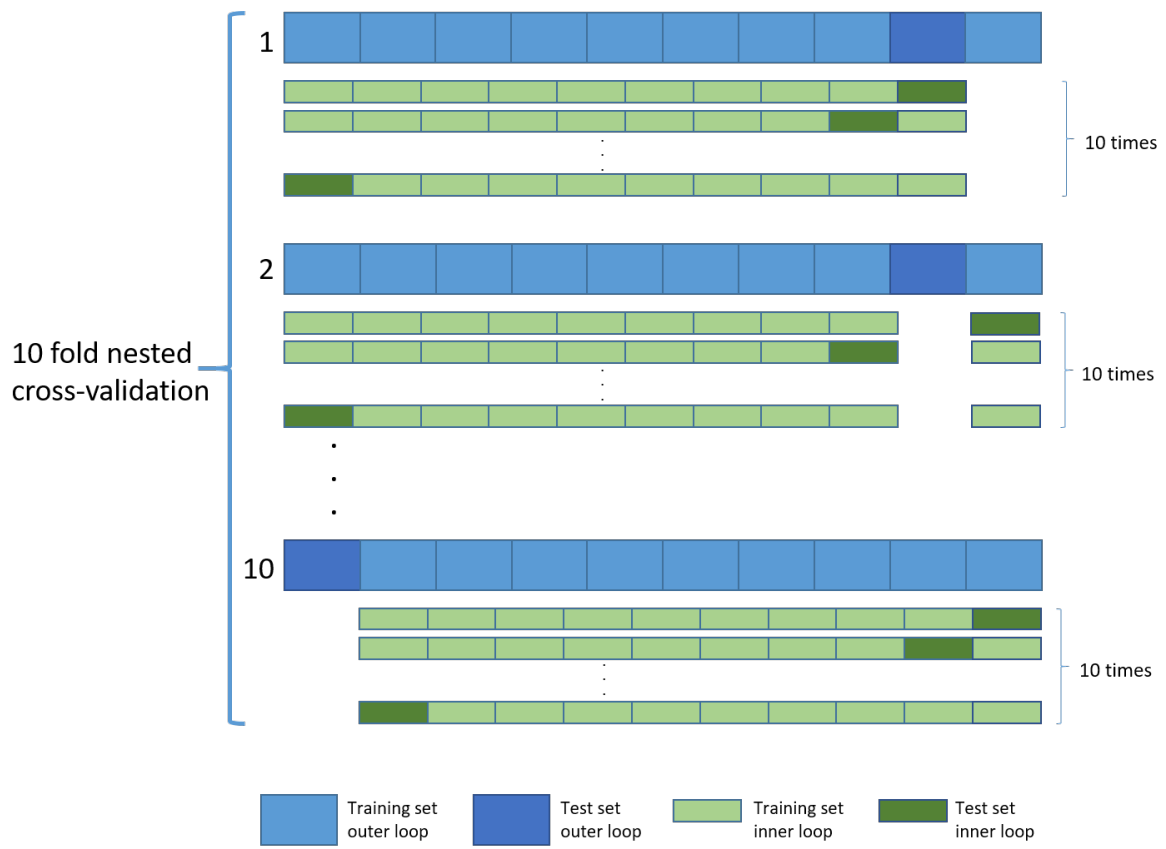

**Supplementary Figure 2.** Scheme of 10 fold nested cross-validation.

A)

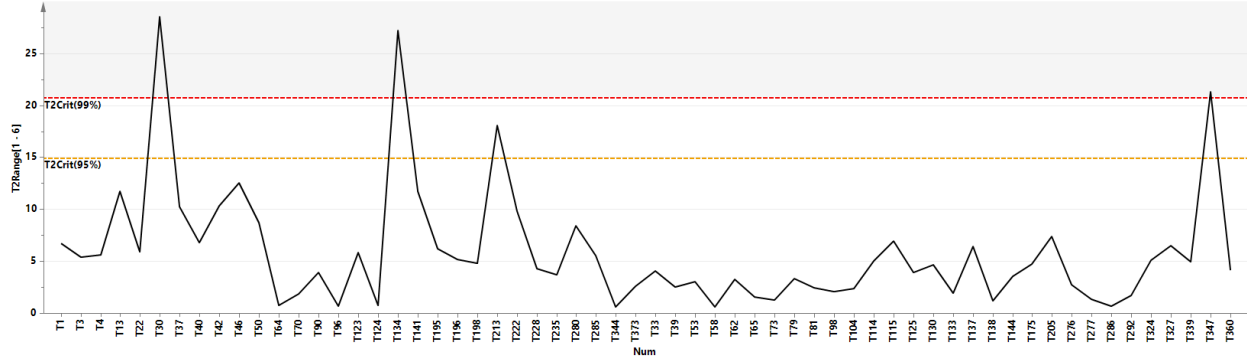

B)

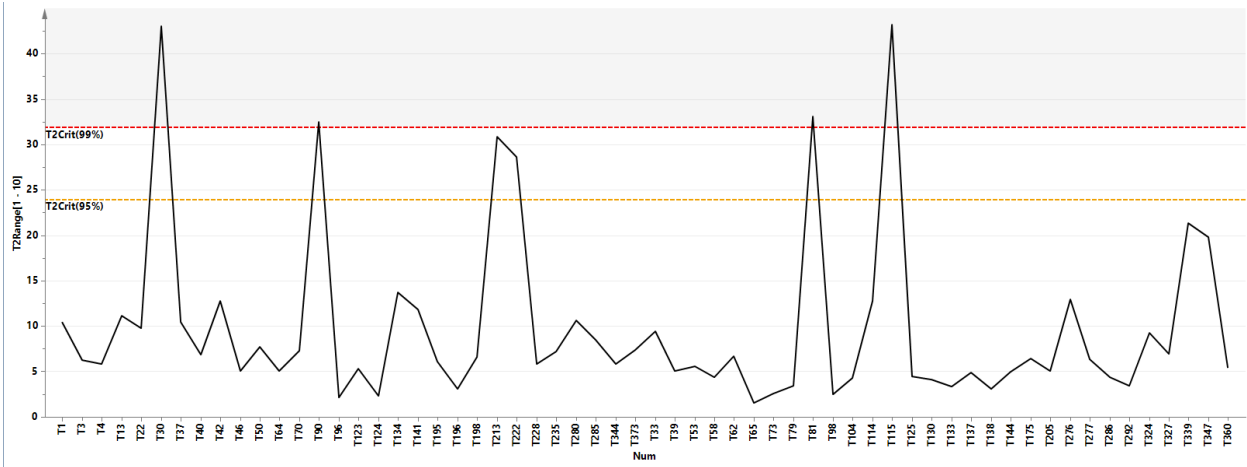

**Supplementary Figure. 3** The line plot of samples, the X axis indicates the number of samples, the Y axis indicates the 95% confidence interval. A) ESI-mode; B) ESI+mode

A)

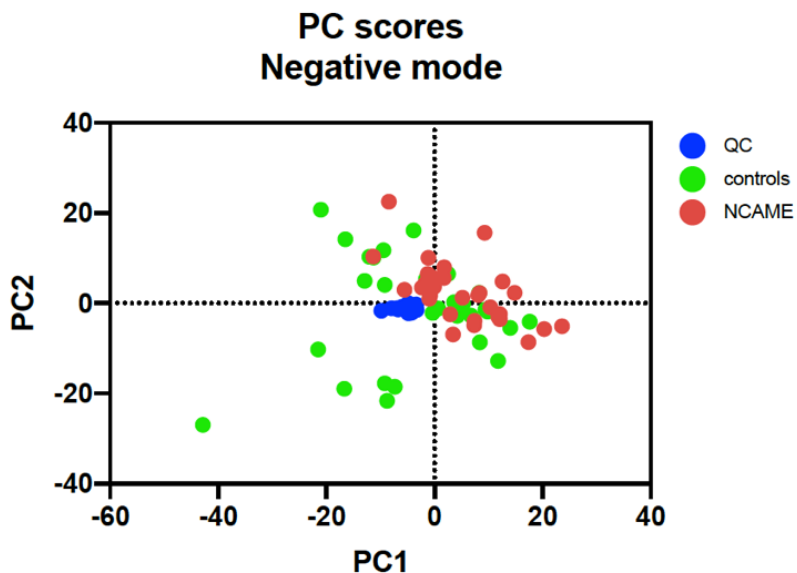

B)

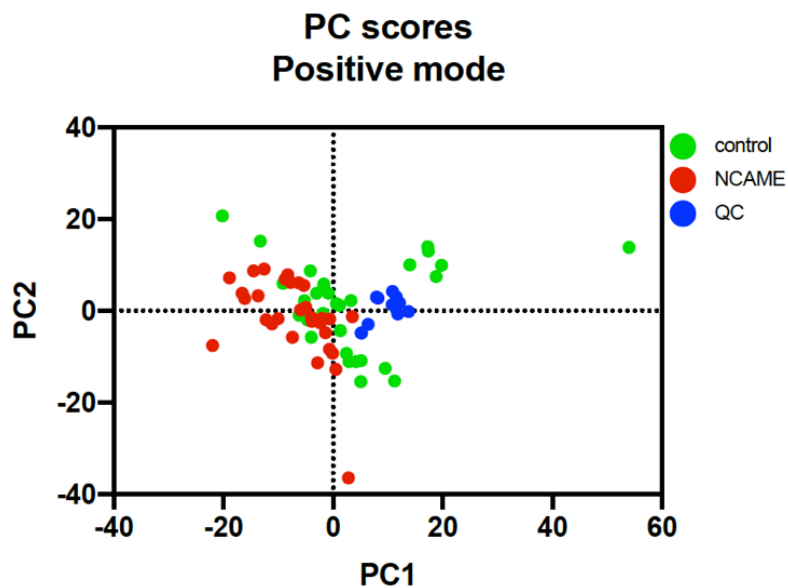

**Supplementary Figure 4.** The scores scatter plot of Principal component analysis (PCA) model based in untargeted metabolomic profiling of serum sample from NCA-ME and control subjects. On a PCA score plot each dot represents a sample. **A)** show negative electrospray ionization (ESI) mode **B)** show positive electrospray ionization (ESI) mode. PC1, first principle component score; PC2, second principle component score; QC, quality control sample.



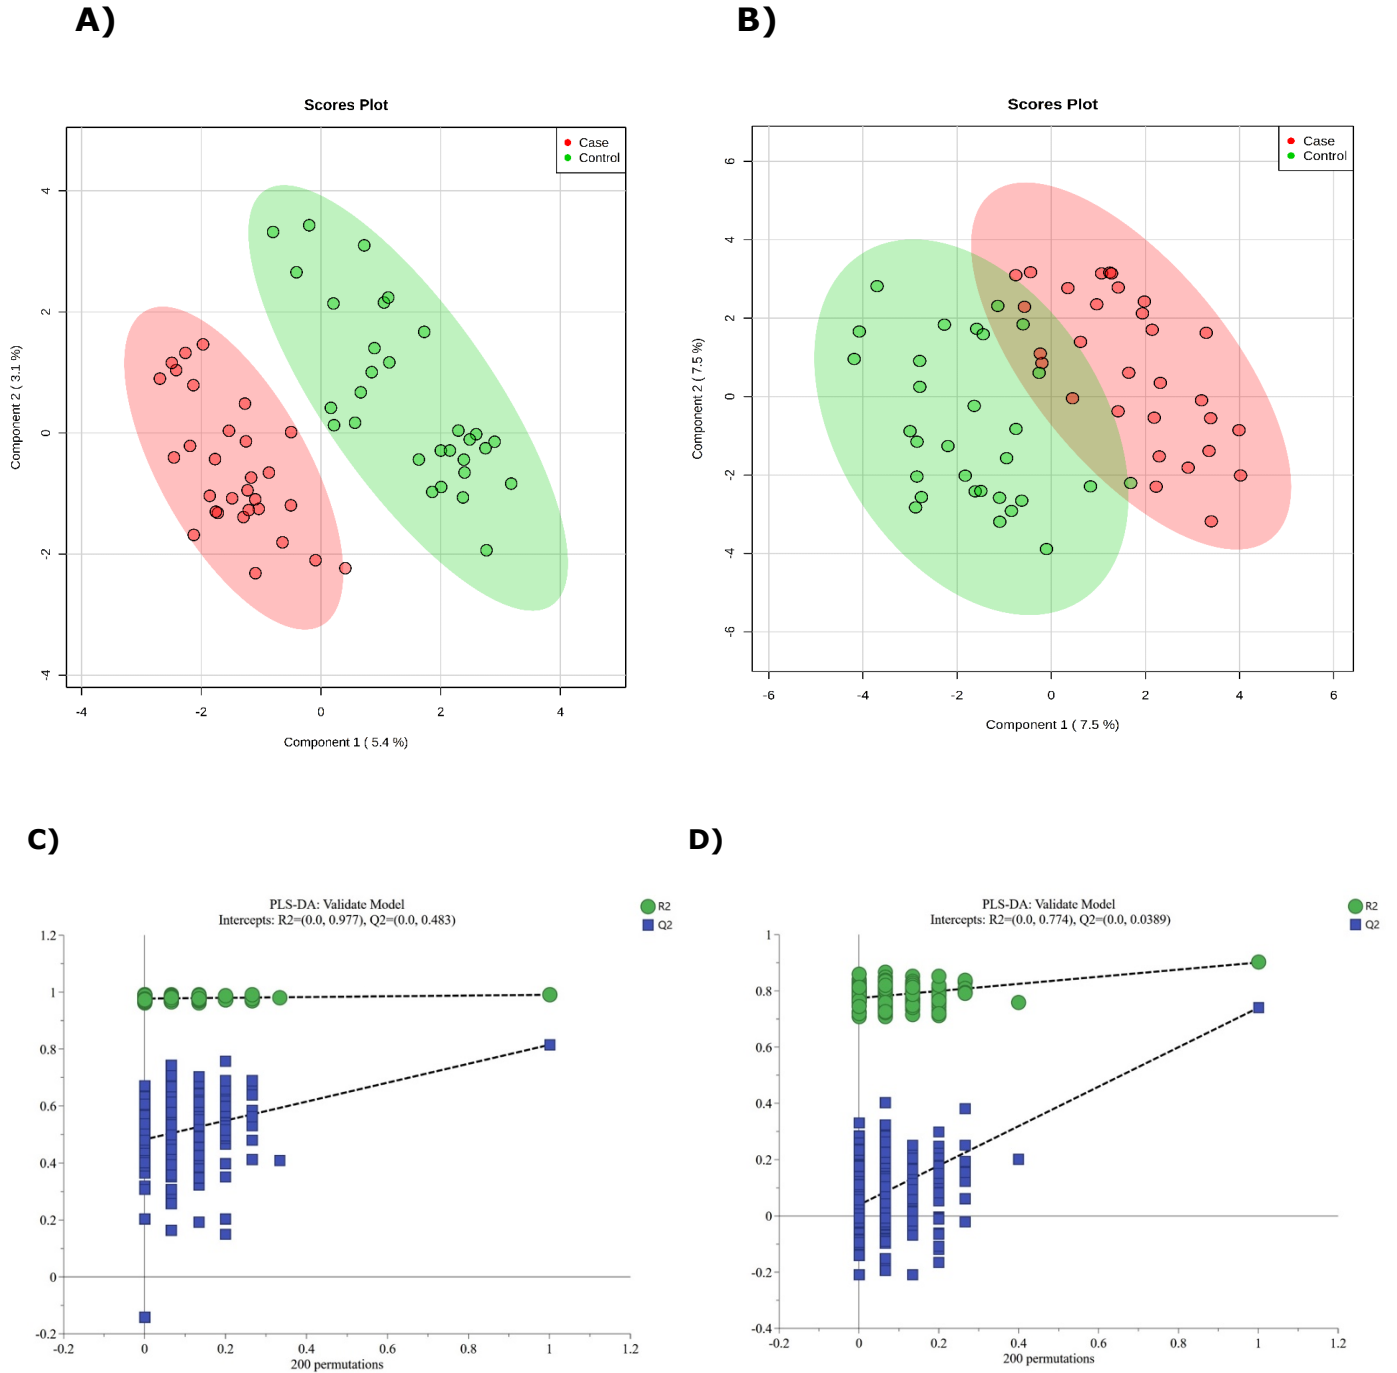

**Supplementary Figure 5. The partial least squares-discriminant analysis (PLS-DA) model of metabolite profiling data.** A) scores scatter plot of ESI negative mode, PC1 and PC2 can explain 5.4% and 3.1%, respectively, of the dataset total variance; B) scores scatter plot of ESI positive mode, PC1 and PC2 can explain 7.5% and 7.5%, respectively, of the dataset total variance. C) Permutation test in negative ion data. D) Permutation test in positive ion data.

A)

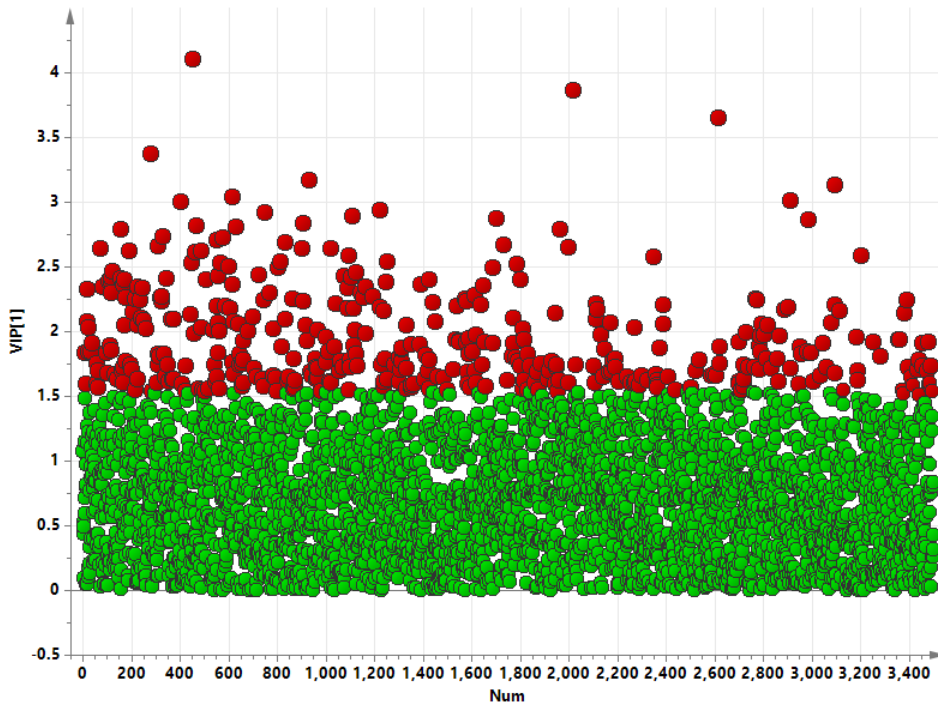

B)

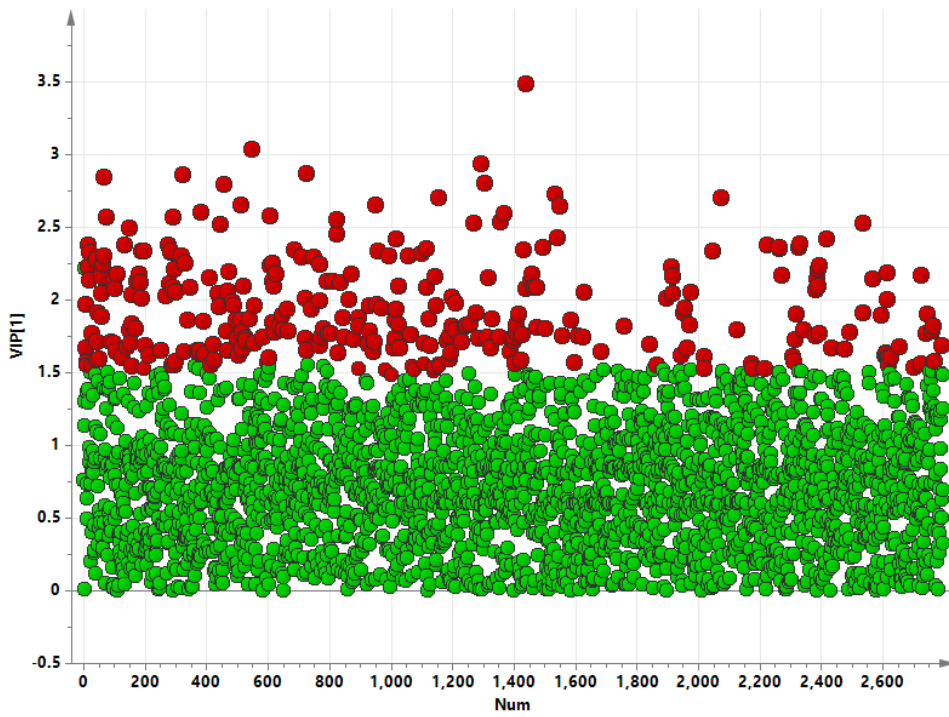

**Supplementary Figure 6.** The distribution of variable importance in projection (VIP) values (VIP>1.5). A) Electrospray ionization in negative mode; B) Electrospray ionization in positive mode.

A)

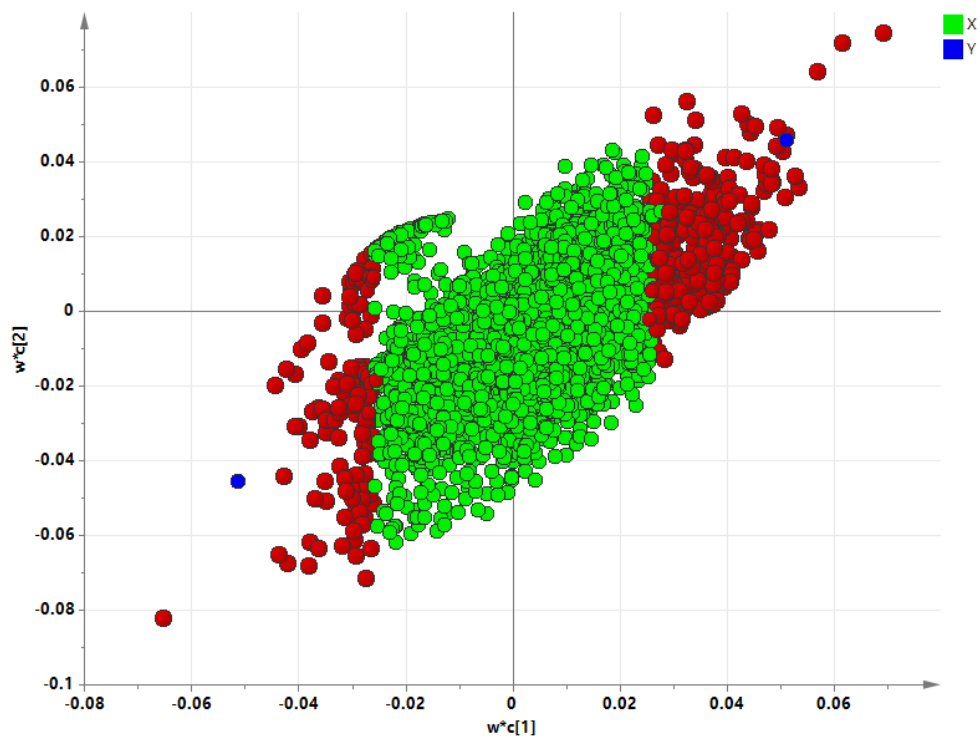

B)

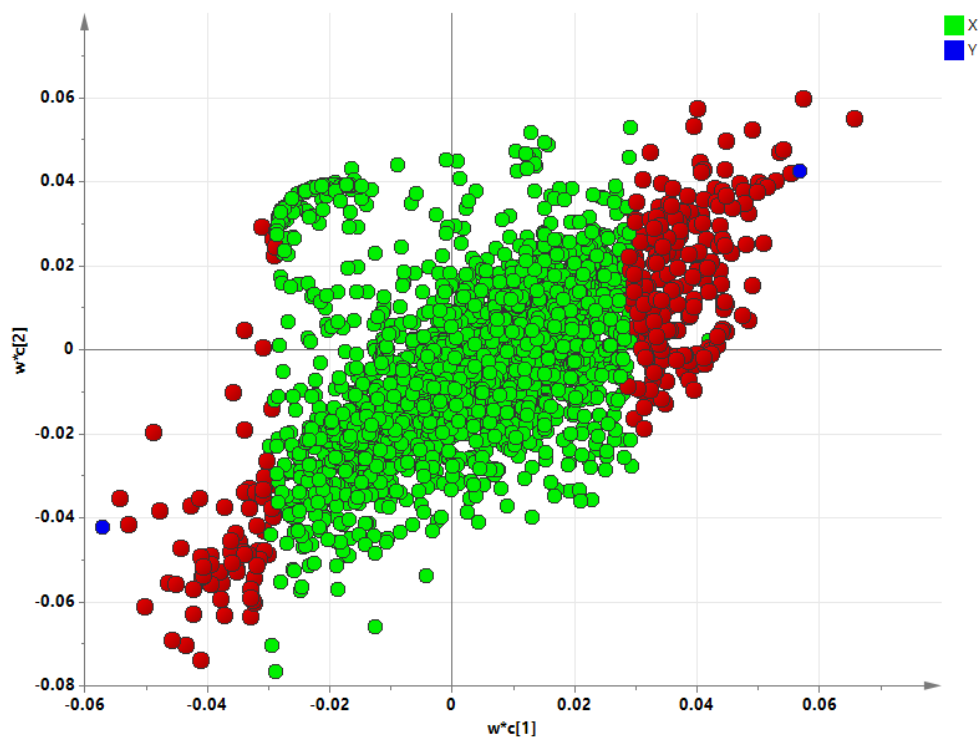

**Supplementary Figure 7.** The loading plot of PLS-DA model. The metabolites with red box were labeled as significant compounds ( $VIP > 1.5$ ). A) ESI-mode; B) ESI+mode.

A)

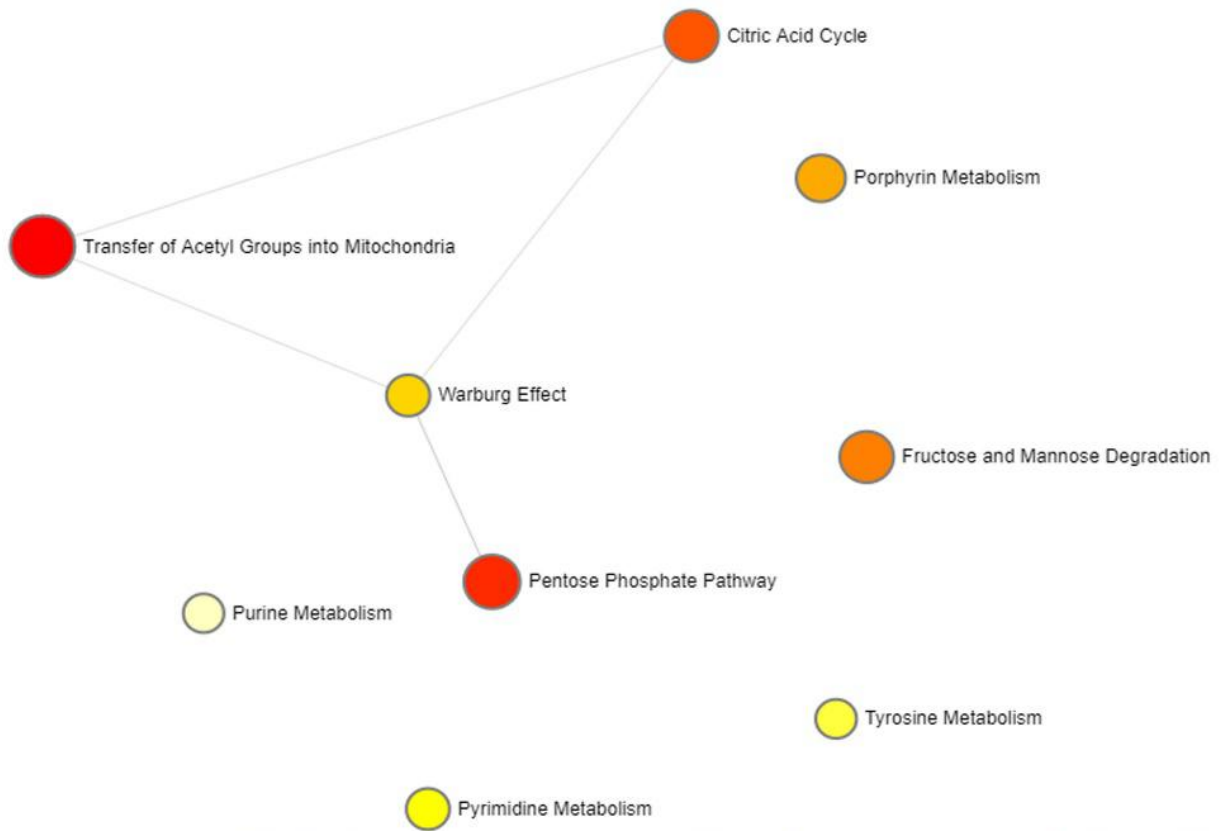

|  | Metabolite Set                              | Total | Hits | Expect | P value | Holm P | FDR |
|--|---------------------------------------------|-------|------|--------|---------|--------|-----|
|  | Transfer of Acetyl Groups into Mitochondria | 22    | 1    | 0.172  | 0.16    | 1.0    | 1.0 |
|  | Pentose Phosphate Pathway                   | 29    | 1    | 0.227  | 0.206   | 1.0    | 1.0 |
|  | Citric Acid Cycle                           | 32    | 1    | 0.25   | 0.225   | 1.0    | 1.0 |
|  | Fructose and Mannose Degradation            | 32    | 1    | 0.25   | 0.225   | 1.0    | 1.0 |
|  | Porphyrim Metabolism                        | 40    | 1    | 0.312  | 0.274   | 1.0    | 1.0 |
|  | Warburg Effect                              | 58    | 1    | 0.453  | 0.374   | 1.0    | 1.0 |
|  | Pyrimidine Metabolism                       | 59    | 1    | 0.461  | 0.379   | 1.0    | 1.0 |
|  | Tyrosine Metabolism                         | 72    | 1    | 0.562  | 0.443   | 1.0    | 1.0 |
|  | Purine Metabolism                           | 74    | 1    | 0.578  | 0.452   | 1.0    | 1.0 |

**B)**

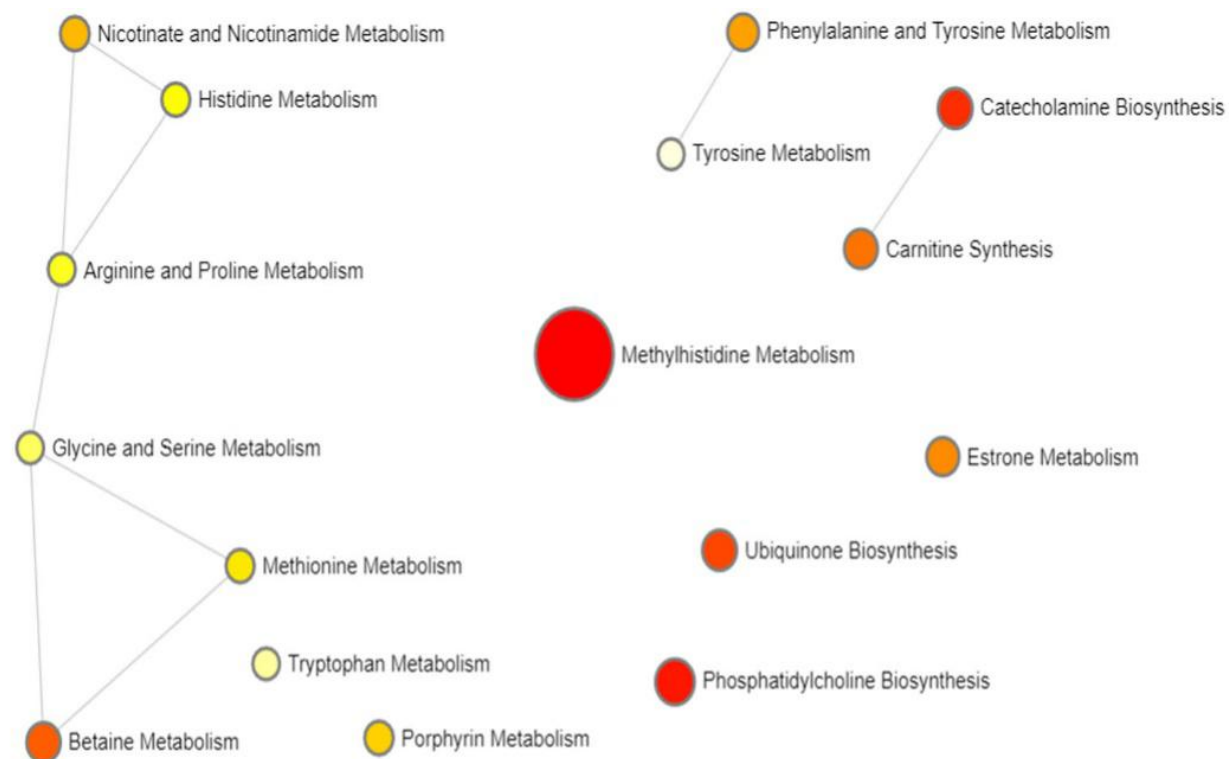

| Metabolite Set                         | Total | Hits | Expect | P value | Holm P | FDR |
|----------------------------------------|-------|------|--------|---------|--------|-----|
| Methyhistidine Metabolism              | 4     | 1    | 0.0469 | 0.0461  | 1.0    | 1.0 |
| Phosphatidylcholine Biosynthesis       | 14    | 1    | 0.164  | 0.153   | 1.0    | 1.0 |
| Catecholamine Biosynthesis             | 20    | 1    | 0.234  | 0.212   | 1.0    | 1.0 |
| Ubiquinone Biosynthesis                | 20    | 1    | 0.234  | 0.212   | 1.0    | 1.0 |
| Betaine Metabolism                     | 21    | 1    | 0.246  | 0.221   | 1.0    | 1.0 |
| Carnitine Synthesis                    | 22    | 1    | 0.258  | 0.231   | 1.0    | 1.0 |
| Estrone Metabolism                     | 24    | 1    | 0.281  | 0.249   | 1.0    | 1.0 |
| Phenylalanine and Tyrosine Metabolism  | 28    | 1    | 0.328  | 0.284   | 1.0    | 1.0 |
| Nicotinate and Nicotinamide Metabolism | 37    | 1    | 0.434  | 0.359   | 1.0    | 1.0 |
| Porphyrin Metabolism                   | 40    | 1    | 0.469  | 0.382   | 1.0    | 1.0 |
| Methionine Metabolism                  | 43    | 1    | 0.504  | 0.404   | 1.0    | 1.0 |
| Histidine Metabolism                   | 43    | 1    | 0.504  | 0.404   | 1.0    | 1.0 |
| Arginine and Proline Metabolism        | 53    | 1    | 0.621  | 0.473   | 1.0    | 1.0 |
| Glycine and Serine Metabolism          | 59    | 1    | 0.691  | 0.511   | 1.0    | 1.0 |
| Tryptophan Metabolism                  | 60    | 1    | 0.703  | 0.517   | 1.0    | 1.0 |
| Tyrosine Metabolism                    | 72    | 1    | 0.844  | 0.585   | 1.0    | 1.0 |

**Supplementary Figure 8.** Pathway enrichment analysis of perturbed metabolites. A) At negative ion mode B) At positive ion mode.
